# Supplementary material for: Adamantane-Isothiourea Hybrid Derivatives: Synthesis, Characterization, In Vitro Antimicrobial, and In Vivo Hypoglycemic Activities
Source: Molecules. 2017 Apr 29;22(5):710. doi: 10.3390/molecules22050710 (PMC6154638; doi:10.3390/molecules22050710)
Supplement: Supplementary file 1 [file molecules-22-00710-s001.pdf]

## Supplementary Materials

### **Adamantane-Isothiourea Hybrid Derivatives: Synthesis, Characterization, *In Vitro* Antimicrobial and *In Vivo* Hypoglycemic Activities**

#### ***Determination of in vitro antimicrobial activity (agar disc diffusion method)***

Sterile filter paper discs (8 mm diameter) were moistened with the compound solution in dimethyl sulphoxide of specific concentration (200 µg/disc), and the antibacterial drugs, gentamicin sulphate and ampicillin trihydrate (100 µg/disc) and the antifungal drug clotrimazole (100 µg/disc), were carefully placed on agar culture plates that had been previously inoculated separately with the microorganisms. The plates were incubated at 37 °C, and the diameters of the growth inhibition zones were measured after 24 hours for bacteria and 48 hours for *C. albicans*.

#### ***Determination of the minimal inhibitory concentration (MIC)***

Compounds **7a-e**, **8a-e**, gentamicin sulphate, ampicillin trihydrate, and clotrimazole were dissolved in dimethyl sulphoxide at a concentration of 128 µg/mL. The two-fold dilutions of the solution were prepared (128, 64, 32, ..., 0.25 µg/mL). Suspensions of the microorganisms at concentrations of 10<sup>6</sup> colony-forming units per mL were inoculated in the corresponding wells. The plates were then incubated at 36°C for 24 hours. The MIC values were determined as the lowest concentrations that completely inhibited visible growth of the microorganism as detected by the unaided eye.

#### ***Determination of the in vivo hypoglycemic activity***

*Animals:* Locally bred male Sprague-Dawley rats (250 ± 30 g body weight) were housed in wire-bottomed cages at 22±2 °C. A standard pellet diet and tap water were supplied *ad libitum*. The animals were acclimatized to these conditions for 15 days before the experiment.

*Induction of experimental diabetes:* The animals were fasted for 16 hours before the induction of diabetes with STZ. The animals were injected intraperitoneally with 0.22-0.25 mL of a freshly prepared solution STZ (60 mg/mL in 0.01 M citrate buffer, pH 4.5) at a final dose of 60 mg/kg body weight. Only rats with serum glucose levels greater than 250 mg/dL were used in experiments.

*Design of the experiment:* Homogenous suspensions of compounds **7a-e**, **8a-e** and the oral hypoglycaemic drug gliclazide in 0.5% (w/v) aqueous carboxymethyl cellulose (CMC) solution

were prepared at specific concentration of 10 mg/mL. The hypoglycemic activity of the compounds **7a-e**, **8a-e** was assessed 48 hours post STZ injection. The diabetic rats were fasted for 16 hours and divided into 18 groups each of 5 animals (n = 5) and the serum glucose level was determined for each group and considered as the initial fasting serum glucose (C<sub>0</sub>). Group 1, which served as the negative diabetic control group, received a single oral dose of 0.5% (w/v) aqueous CMC solution (5 mL/kg). Groups 2 was treated with 10 mg/kg gliclazide in 0.5% (w/v) aqueous CMC (positive control). Groups 3-18 were treated with either a single oral dose of the 10 or 20 mg/kg of the test compounds. All treatments were administered by oral gavage. 24 Hours after treatment, the blood samples were collected and the serum glucose level (C<sub>24</sub>) was determined for each group.

*Determination of serum glucose:* Blood samples from the animal tail vein were collected, allowed to clot, centrifuged at 2000 r.p.m. for 10 minutes. Blood glucose levels were expressed in mg/dL as mean  $\pm$  SEM. The data were statistically analysed using ANOVA with Tukey's multiple comparison test. The values of  $p < 0.01$  were considered as significant. The percentage of serum glucose reduction for each group was calculated in relation to the initial serum glucose level as follows:

$$\% \text{ Serum glucose reduction} = [(C_0 - C_{24}/C_0)] \times 100$$

where C<sub>0</sub> is the mean initial fasting serum glucose level, C<sub>24</sub> is the mean serum glucose level 24 hours after treatment.

**Table S1.** Molecular formulae, molecular weights and elemental analyses data of compounds **7a-e** and **8a-e**.

| Comp. No. | Mol. Formula (Mol. Wt.)                                                   | Analysis: % Calcd. (Found) |             |               |             |
|-----------|---------------------------------------------------------------------------|----------------------------|-------------|---------------|-------------|
|           |                                                                           | C                          | H           | N             | S           |
| <b>7a</b> | C <sub>22</sub> H <sub>30</sub> N <sub>2</sub> OS (370.55)                | 71.31 (71.18)              | 8.16 (8.24) | 7.56 (7.42)   | 8.65 (8.65) |
| <b>7b</b> | C <sub>22</sub> H <sub>29</sub> ClN <sub>2</sub> OS (405.0)               | 65.24 (65.11)              | 7.22 (7.34) | 6.92 (6.90)   | 7.92 (7.90) |
| <b>7c</b> | C <sub>22</sub> H <sub>29</sub> BrN <sub>2</sub> OS (449.45)              | 58.79 (58.65)              | 6.50 (6.52) | 6.23 (6.21)   | 7.13 (7.22) |
| <b>7d</b> | C <sub>22</sub> H <sub>29</sub> N <sub>3</sub> O <sub>3</sub> S (415.55)  | 63.59 (63.24)              | 7.03 (7.22) | 10.11 (9.98)  | 7.72 (7.68) |
| <b>7e</b> | C <sub>24</sub> H <sub>28</sub> F <sub>6</sub> N <sub>2</sub> OS (506.55) | 56.91 (56.62)              | 5.57 (5.65) | 5.53 (5.50)   | 6.33 (6.35) |
| <b>8a</b> | C <sub>28</sub> H <sub>35</sub> N <sub>3</sub> S (445.66)                 | 75.46 (75.38)              | 7.92 (8.00) | 9.43 (9.42)   | 7.19 (7.21) |
| <b>8b</b> | C <sub>28</sub> H <sub>34</sub> ClN <sub>3</sub> S (480.11)               | 70.05 (69.88)              | 7.14 (7.22) | 8.75 (8.72)   | 6.68 (6.67) |
| <b>8c</b> | C <sub>28</sub> H <sub>34</sub> BrN <sub>3</sub> S (524.56)               | 64.11 (64.09)              | 6.53 (6.64) | 8.01 (7.96)   | 6.11 (6.13) |
| <b>8d</b> | C <sub>28</sub> H <sub>34</sub> N <sub>4</sub> O <sub>2</sub> S (490.66)  | 68.54 (68.54)              | 6.98 (7.01) | 11.42 (11.35) | 6.54 (6.51) |
| <b>8e</b> | C <sub>30</sub> H <sub>33</sub> F <sub>6</sub> N <sub>3</sub> S (581.66)  | 61.95 (61.90)              | 5.72 (5.76) | 7.22 (7.05)   | 5.51 (5.53) |
